# Supplementary material for: Exploiting Phenylpropanoid Derivatives to Enhance the Nutraceutical Values of Cereals and Legumes
Source: PubMed Central journal article supplement (PMC4891577; doi:10.3389/fpls.2016.00763), 2016-06-03
Supplement: Table1.pdf [file Table1.pdf]

**Supplementary Table 1. Abiotic and biotic factors impacting accumulation of phenylpropanoid constituent's in staple cereals and food legumes.**

| <b>Crop</b>                                                                                    | <b>Factor</b>                                            | <b>Compound</b>                                                   | <b>References</b>                                                                    |
|------------------------------------------------------------------------------------------------|----------------------------------------------------------|-------------------------------------------------------------------|--------------------------------------------------------------------------------------|
| <i>Abiotic stress</i>                                                                          |                                                          |                                                                   |                                                                                      |
| <b>Legumes</b>                                                                                 |                                                          |                                                                   |                                                                                      |
| Common bean<br>( <i>Phaseolus vulgaris</i> L.)                                                 | Drought                                                  | Polyphenols                                                       | Ovando-Martínez et al., 2014                                                         |
| Soybean ( <i>Glycine max</i><br>(L.) Merr)                                                     | UV-B, drought,<br>CO <sub>2</sub> , temperature          | Isoflavone                                                        | Caldwell et al., 2005; Kim et al., 2011; Carrera and Dardanelli, 2015                |
| Pea ( <i>Pisum sativum</i> L.)                                                                 | Drought                                                  | Total Phenolic                                                    | Juzoń et al., 2013                                                                   |
| Mungbean ( <i>Vigna radiata</i> (L.) R.<br>(Wilczek)                                           | Drought, ozone                                           | Total Phenolic                                                    | Afzal et al., 2014; Chaudhary and Agrawal, 2015                                      |
| <b>Cereals</b>                                                                                 |                                                          |                                                                   |                                                                                      |
| Maize ( <i>Zea mays</i> L.)                                                                    | Drought                                                  | Flavonoids and phenolic                                           | Ali et al., 2010                                                                     |
| Barley ( <i>Hordeum vulgare</i> L.)                                                            | Drought, salinity                                        | Total phenolic                                                    | Ahmed et al., 2013a                                                                  |
| Rice ( <i>Oryza sativa</i> L.)                                                                 | Salinity, CO <sub>2</sub> , $\gamma$ -irradiation, ozone | Phenolic, anthocyanins, and proanthocyanins                       | Chunthaburee et al., 2015; Wang and Frei, 2011; Goufo et al., 2014; Zhu et al., 2010 |
| Wheat ( <i>Triticum</i> spp.)                                                                  | Drought, nitrogen, UV                                    | Total phenolic acids, free phenolic acids, flavonoids, and lutein | Chakraborty and Pradhan, 2012; Lukow et al., 2012; Stumpf et al., 2015               |
| <i>Biotic Stress</i>                                                                           |                                                          |                                                                   |                                                                                      |
| <b>Legumes</b>                                                                                 |                                                          |                                                                   |                                                                                      |
| Cowpea ( <i>Vigna unguiculata</i> (L.) Walp.); chickpea ( <i>Cicer arietinum</i> L.); soybean, | Postharvest pests                                        | Phenolic acids                                                    | Sharma and Thakur, 2014                                                              |
| Common bean, cowpea, and soybean                                                               | Pathogens, fungus, bacteria & insects                    | Flavonoids and isoflavonoids                                      | Treutte, 2006; Rubiales et al., 2015                                                 |
| Soybean                                                                                        | Host-plant defense                                       | Isoflavonoids                                                     | Mapope and Dakora, 2013                                                              |
| <b>Cereals</b>                                                                                 |                                                          |                                                                   |                                                                                      |
| Wheat ( <i>Triticum aestivum</i> L.)                                                           | <i>Fusarium</i> species                                  | Phenolic acids                                                    | McKeehen et al., 1999                                                                |
| Barley ( <i>Hordeum vulgare</i> L.)                                                            | <i>Fusarium</i> species                                  | Phenolic acids                                                    | Eggert et al., 2010                                                                  |
| Maize ( <i>Zea mays</i> L.)                                                                    | Postharvest pests                                        | Phenolic acids                                                    | Ahmed et al., 2013b; García-Lara and Bergvinson, 2014                                |
| Rice ( <i>Oryza sativa</i> L.)                                                                 | Postharvest pests                                        | Phenolic acids                                                    | Bamisile et al., 2014                                                                |
