# Supplementary material for: Exploiting Phenylpropanoid Derivatives to Enhance the Nutraceutical Values of Cereals and Legumes
Source: PubMed Central journal article supplement (PMC4891577; doi:10.3389/fpls.2016.00763), 2016-06-03
Supplement: Table2.pdf [file Table2.pdf]

**Supplementary Table 2. Transcriptional factors that regulate the genes involved in flavonoid biosynthesis.**

| Species                                          | Genes                      | Transcription factors/ complex                                           | Function                                            | References                                                      |
|--------------------------------------------------|----------------------------|--------------------------------------------------------------------------|-----------------------------------------------------|-----------------------------------------------------------------|
| Thale Cress<br>( <i>Arabidopsis thaliana</i> L.) | <i>CHS, CHI, F3H</i>       | MYB11/ MYB12/ MYB111                                                     | Induces proanthocyanidin biosynthesis in seedlings  | Stracke et al., 2007                                            |
|                                                  | <i>DFR, LDOX, UGT</i>      | PAP1/PAP2/MYB113/MYB114 (R2R3-MYBs)<br>TT8/GL3/EGL3 (bHLH)<br>TTG1 (WDR) | Induces anthocyanin biosynthesis in seedlings       | Gonzalez et al., 2008                                           |
|                                                  | <i>F3H, DFR, LDOX</i>      | PAP1/PAP2/MYB113/MYB114<br>TT8/GL3/EGL3<br>TTG1<br>SPL9                  | Inhibits anthocyanin biosynthesis                   | Gou et al., 2011                                                |
|                                                  | <i>F3H, DFR, LDOX, UGT</i> | R3-MYBs/CPC/MYBL2<br><br>TT8/GL3/EGL3                                    | Inhibits anthocyanin biosynthesis                   | Dubos et al., 2008;<br>Matsui et al., 2008;<br>Zhu et al., 2009 |
| Petunia<br>( <i>Petunia × hybrida</i> )          | <i>DFR, LDOX, UGT</i>      | AN2/AN4 (R2R3-MYB)<br><br>AN1 (bHLH)<br>AN11 (WDR)                       | Activates anthocyanin biosynthesis in floral organs | Spelt et al., 2000                                              |
|                                                  | <i>DFR, LDOX, UGT</i>      | MYB27 (R2R3-MYB)<br>AN1                                                  | Inhibits anthocyanin biosynthesis                   | Albert et al., 2011                                             |
|                                                  | <i>DFR, LDOX, UGT</i>      | MYBx (R2R3-MYB)<br>AN1                                                   | Inhibits anthocyanin biosynthesis                   | Albert et al., 2011                                             |
| Tobacco<br>( <i>Nicotiana tabacum</i> L.)        | <i>DFR, LDOX, UGT</i>      | NtAN2 (R2R3-MYB)<br><br>NtAN1 (bHLH)                                     | Activates anthocyanin biosynthesis in flowers       | Bai et al., 2011;<br>Pattanaik et al., 2010                     |
| Snapdragon<br>( <i>Antirrhinum majus</i> L.)     | <i>DFR, LDOX, UGT</i>      | ROSEA1/ ROSEA2/ VENOSA (R2R3-MYB)<br>DELILA/MUTABILIS (bHLH)             | Regulates anthocyanin biosynthesis in flowers       | Schwinn et al., 2006                                            |
| Maize ( <i>Zea mays</i> L.)                      | <i>DFR, LDOX, UGT</i>      | C1/PL (R2R3-MYB)<br><br>R/B (bHLH)<br>PAC1 (WD40)                        | Activates anthocyanin biosynthesis                  | Carey et al., 2004;<br>Grotewold et al., 2000                   |

|                                                      |                       |                                                                     |                                                                                         |                                                             |
|------------------------------------------------------|-----------------------|---------------------------------------------------------------------|-----------------------------------------------------------------------------------------|-------------------------------------------------------------|
| Apple<br>( <i>Malus domestica</i> Brokh. 1983)       | <i>DFR, LDOX, UGT</i> | MdMYB1/MdMYB10/MdMYBA                                               | Regulates anthocyanin biosynthesis in fruits                                            | Ban et al., 2007; Espley et al., 2007                       |
| Grape ( <i>Vitis vinifera</i> L.)                    | <i>LAR1, ANR</i>      | MdbHLH3/ MdbHLH33<br>VvMYBA1/2/5a/5b (R2R3-MYBs)                    | Activates anthocyanin biosynthesis in skin and seeds                                    | Deluc et al., 2006; Matus et al., 2010; Hichri et al., 2010 |
| Strawberry<br>( <i>Fragaria × ananassa</i> Duchesne) | <i>DFR, LDOX, UGT</i> | VvMYC1/VvMYCA1 (bHLH)<br>VvWDR1/VvWDR2 (WD40)<br>FaMYB10 (R2R3-MYB) | Activates anthocyanin biosynthesis                                                      | Lin-Wang et al., 2010                                       |
| Rice ( <i>Oryza sativa</i> L.)                       | <i>DFR, ANS</i>       | FaMYB1 (R2R3-MYB)<br>OsC1-MYB<br>Rc/Rd (bHLH)                       | Represses anthocyanin biosynthesis<br>Activates anthocyanin biosynthesis in plant shoot | Himi and Taketa, 2015; Hichri et al., 2011                  |
| Wheat<br>( <i>Triticum aestivum</i> L.)              | <i>DFR</i>            | TaC1-A1/ B1/D1                                                      | Regulates anthocyanin synthesis in vegetative tissues                                   | Himi and Taketa, 2015                                       |
| Barley<br>( <i>Hordeum vulgare</i> L.)               | <i>DFR</i>            | Hvmyb10<br>HvbHLH1<br>HvC1                                          | Regulates proanthocyanidin biosynthesis in grains                                       | Himi and Taketa, 2015                                       |
